# Supplementary material for: Explainable artificial intelligence using wavelet-transformed surface electromyography images to detect Parkinson’s disease during sit-to-walk
Source: Research Square preprint supplement (doi:10.21203/rs.3.rs-7911995/v1), 2025-11-20
Supplement: Supplementary file 1 [file 20694aa1e51293c1bd6b2486.pdf]

## Supplementary material

### Supplementary Table 1

As described in the manuscript text, it provides the definitions and computational formulas for all EMG-derived variables used in your study. This table organizes the features into several domains. Feature extraction was automated with custom MATLAB scripts.

| Features                   | Definition                                                                                          | Computational formula                                                                                                                                                                                                                                                                                                                                                                                                                                                                                                                  |
|----------------------------|-----------------------------------------------------------------------------------------------------|----------------------------------------------------------------------------------------------------------------------------------------------------------------------------------------------------------------------------------------------------------------------------------------------------------------------------------------------------------------------------------------------------------------------------------------------------------------------------------------------------------------------------------------|
| Root Mean Square (RMS)     | Represents the overall magnitude of the EMG signal, reflecting average muscle activation intensity. | $RMS = \sqrt{\frac{1}{N} \sum_{i=1}^N (x_i)^2}$ <p><math>x_i</math>: filtered EMG signal at sample <math>i</math><br/> <math>N</math>: number of samples</p>                                                                                                                                                                                                                                                                                                                                                                           |
| Integrated EMG (iEMG)      | Cumulative measure of total muscle activity over a period.                                          | $iEMG = \int_0^T  x(t)  dt$ $iEMG \approx \sum_{n=1}^N  x[n]  \cdot \Delta t$ $iEMG \approx \Delta t \left( \frac{ x[1] }{2} + \sum_{n=2}^{N-1}  x[n]  + \frac{ x[N] }{2} \right)$ <p><math>x(t)</math>: EMG signal as a function of time<br/> <math>T</math>: duration of the signal<br/> <math>x[n]</math>: EMG signal at sample <math>n</math><br/> <math>N</math>: number of samples<br/> <math>\Delta t</math>: sampling interval</p>                                                                                             |
| Peak Amplitude             | Maximum absolute amplitude of the EMG signal.                                                       | $Peak\ Amplitude = \max_{0 \leq t \leq T}  x(t) $ <p><math>x(t)</math>: EMG signal as a function of time<br/> <math>T</math>: duration of the signal</p>                                                                                                                                                                                                                                                                                                                                                                               |
| Co-contraction Index (CCI) | Degree of simultaneous activation between agonist–antagonist muscle pairs (e.g., RF–BFs, TA–MG).    | $x_{norm}(t) = \frac{x(t)}{\max( x(t) )}$ $CCI = \frac{\sum_t ( EMG_{a_{norm}}(t)  \cdot  EMG_{an_{norm}}(t) )}{\sum_t ( EMG_{a_{norm}}(t)  +  EMG_{an_{norm}}(t) )}$ <p><math>x(t)</math>: EMG signal at time <math>t</math><br/> <math>x_{norm}(t)</math>: normalized EMG signal<br/> <math>\max( x(t) )</math>: maximum absolute amplitude of the EMG signal over the entire duration<br/> <math>EMG_{a_{norm}}(t)</math>: normalized agonist EMG signal<br/> <math>EMG_{an_{norm}}(t)</math>: normalized antagonist EMG signal</p> |
| Median Frequency           | Frequency below which 50% of the total EMG power spectrum is contained.                             | $x(f) = FFT\{x(t)\}$ $P(f) = \left  \frac{X(f)}{N} \right $                                                                                                                                                                                                                                                                                                                                                                                                                                                                            |

|                                  |                                                                                                                                                               |                                                                                                                                                                                                                                                                                                                                                                                                                                                                                                                                                              |
|----------------------------------|---------------------------------------------------------------------------------------------------------------------------------------------------------------|--------------------------------------------------------------------------------------------------------------------------------------------------------------------------------------------------------------------------------------------------------------------------------------------------------------------------------------------------------------------------------------------------------------------------------------------------------------------------------------------------------------------------------------------------------------|
|                                  |                                                                                                                                                               | $C(f) = \sum_{i=0}^k P(f_i)$ $P_{total} = C(f_{max})$ $f_{med} \text{ such that } C(f_{med}) \geq \frac{P_{total}}{2}$ <p> <i>x(t): EMG signal in the time domain</i><br/> <i>X(f): Fourier transform of x(t)</i><br/> <i>x(t): EMG signal in the time domain</i><br/> <i>N: number of samples</i><br/> <i>P(f): amplitude spectrum (magnitude normalized by N)</i><br/> <i>C(f<sub>k</sub>): cumulative sum of spectral power up to frequency bin f<sub>k</sub></i><br/> <i>P<sub>total</sub>: cumulative spectral power across all frequency bins</i> </p> |
| Mean Frequency                   | Power-weighted average frequency of the EMG spectrum.                                                                                                         | $f_{mean} = \frac{\sum_{i=1}^N f_i \cdot P(f_i)}{\sum_{i=1}^N P(f_i)}$ <p> <i>f<sub>i</sub>: frequency at the i<sup>th</sup> bin</i><br/> <i>P(f<sub>i</sub>): power (or amplitude spectrum) at frequency f<sub>i</sub></i><br/> <i>N: total number of frequency bins</i> </p>                                                                                                                                                                                                                                                                               |
| Frequency Band Power (20–150 Hz) | Power of EMG within a specific frequency range, reflecting muscle recruitment dynamics.                                                                       | $P_{band} = \sum_{f=f_{20}}^{f_{150}} P(f)$ <p> <i>P(f): power spectrum at frequency f</i><br/> <i>f<sub>20</sub>: lower cutoff frequency (20 Hz)</i><br/> <i>f<sub>150</sub>: upper cutoff frequency (150 Hz)</i> </p>                                                                                                                                                                                                                                                                                                                                      |
| Entropy                          | Complexity and irregularity of the EMG frequency spectrum.                                                                                                    | $H = - \sum_{i=1}^N P(f_i) \log (P(f_i) + \epsilon)$ <p> <i>P(f<sub>i</sub>): power spectrum at frequency bin f<sub>i</sub></i><br/> <i>N: total number of frequency bins</i><br/> <i>ε: small constant to avoid taking the logarithm of zero</i> </p>                                                                                                                                                                                                                                                                                                       |
| AP SD                            | The standard deviation (SD) of the EMG signal in the anteroposterior directions, quantifying variability in muscle activation, reflecting postural stability. | $AP\_SD = \sqrt{\frac{1}{N-1} \sum_{i=1}^N (x_i - \bar{x})^2}$ <p> <i>x<sub>i</sub>: anteroposterior displacement at sample i</i><br/> <i>̄x: mean values of AP displacement</i><br/> <i>N: number of samples</i> </p>                                                                                                                                                                                                                                                                                                                                       |
| ML SD                            | The SD of the EMG signal in the mediolateral directions, quantifying variability in muscle activation, reflecting lateral stability.                          | $ML\_SD = \sqrt{\frac{1}{N-1} \sum_{i=1}^N (y_i - \bar{y})^2}$ <p> <i>y<sub>i</sub>: mediolateral displacement at sample i</i><br/> <i>̄y: mean values of ML displacement</i><br/> <i>N: number of samples</i> </p>                                                                                                                                                                                                                                                                                                                                          |
